# Supplementary material for: An integrated genomic and metabolomic framework for cell wall biology in rice
Source: PubMed Central journal article supplement (PMC4112216; doi:10.1186/1471-2164-15-596), 2014-07-15
Supplement: 12864_2013_6285_MOESM7_ESM.pdf [file 12864_2013_6285_MOESM7_ESM.pdf]

| <b>Tissues(organs)</b>   | <b>Cellulose (% dry matter)</b> | <b>Arabinose (mg/g)</b> | <b>Xylose (mg/g)</b> | <b>Galactose (mg/g)</b> | <b>H(umol/g)</b> | <b>G(umol/g)</b> | <b>S(umol/g)</b> |
|--------------------------|---------------------------------|-------------------------|----------------------|-------------------------|------------------|------------------|------------------|
| <b>Callus</b>            | 5.31(0.27)*                     | 41.07(4.17)             | 68.07(10.58)         | 14.81(0.69)             | 20.01(1.13)      | 54.98(4.63)      | 6.72(1.00)       |
| <b>Callus/Subculture</b> | 8.69(0.34)                      | 26.31(1.86)             | 23.02(1.21)          | 7.08(0.68)              | 20.49(0.80)      | 33.61(1.55)      | 6.84(0.56)       |
| <b>Germinating seed</b>  | 5.68(0.33)                      | 6.14(0.48)              | 24.60(1.33)          | 1.29(0.26)              | 17.21(1.45)      | 28.63(2.06)      | 3.00(0.22)       |
| <b>Seed germination</b>  | 8.89(0.30)                      | 11.74(1.34)             | 47.41(1.47)          | 2.34(0.13)              | 19.33(2.57)      | 51.82(2.22)      | 8.53(0.93)       |
| <b>Plumule/Dark</b>      | 5.73(0.40)                      | 20.67(1.10)             | 26.95(3.91)          | 5.17(1.51)              | 12.31(0.16)      | 16.60(1.47)      | 2.37(0.33)       |
| <b>Plumule/Light</b>     | 15.77(0.28)                     | 19.35(3.89)             | 61.14(14.48)         | 3.75(0.91)              | 16.19(2.25)      | 10.18(7.02)      | 8.85(0.76)       |
| <b>Radicle/Dark</b>      | 15.49(0.43)                     | 20.60(1.20)             | 59.41(5.75)          | 11.22(0.67)             | 17.44(0.49)      | 18.81(4.95)      | 3.57(1.14)       |
| <b>Radicle/Light</b>     | 17.72(0.68)                     | 22.22(0.49)             | 61.05(5.13)          | 9.25(0.37)              | 14.94(0.36)      | 29.29(1.23)      | 9.04(0.82)       |
| <b>Seedlings</b>         | 16.57(0.23)                     | 28.29(3.27)             | 125.53(20.62)        | 7.51(1.10)              | 23.21(9.01)      | 44.06(13.05)     | 12.13(4.63)      |
| <b>Young shoot</b>       | 13.82(0.08)                     | 14.24(1.77)             | 63.98(11.61)         | 2.27(0.15)              | 21.32(0.81)      | 29.73(0.63)      | 5.33(0.15)       |
| <b>Young Root</b>        | 19.49(0.53)                     | 28.43(0.64)             | 91.87(4.25)          | 8.48(0.36)              | 50.87(2.10)      | 62.15(1.90)      | 25.12(0.08)      |
| <b>Mature Leaf</b>       | 15.14(0.40)                     | 15.27(1.11)             | 79.60(9.01)          | 2.35(0.73)              | 29.39(2.54)      | 34.46(1.75)      | 6.82(0.49)       |
| <b>Old leaf</b>          | 19.19(0.62)                     | 17.60(1.18)             | 78.86(14.60)         | 2.60(0.27)              | 25.67(1.73)      | 40.80(4.52)      | 11.10(1.10)      |
| <b>Mature sheath</b>     | 15.57(0.27)                     | 14.95(0.92)             | 79.57(8.27)          | 1.71(0.46)              | 17.24(3.32)      | 28.90(5.25)      | 6.88(1.33)       |
| <b>Old sheath</b>        | 20.06(0.51)                     | 16.12(0.74)             | 106.52(0.49)         | 1.90(1.08)              | 21.77(0.91)      | 40.70(1.95)      | 12.57(1.69)      |
| <b>Young Flag leaf</b>   | 13.54(0.09)                     | 15.83(0.47)             | 96.56(11.64)         | 1.38(0.09)              | 30.18(10.34)     | 36.61(3.99)      | 7.26(0.27)       |
| <b>Old flag leaf</b>     | 11.69(0.51)                     | 16.39(0.66)             | 108.49(4.55)         | 2.59(0.07)              | 31.12(4.57)      | 57.83(10.61)     | 21.45(3.62)      |
| <b>Panicle 2</b>         | 2.05(0.04)                      | 8.89(1.05)              | 12.87(0.27)          | 3.26(0.29)              | 14.19(0.98)      | 2.45(0.63)       | 7.65(1.44)       |
| <b>Panicle 3</b>         | 1.99(0.10)                      | 9.39(1.66)              | 12.92(1.55)          | 3.44(0.43)              | 20.95(5.66)      | 48.54(3.54)      | 9.76(3.49)       |
| <b>Young Panicle</b>     | 2.77(0.08)                      | 9.56(1.08)              | 14.24(2.91)          | 3.62(1.01)              | 13.62(0.42)      | 1.41(0.43)       | 9.15(1.67)       |
| <b>Old Panicle</b>       | 25.23(0.46)                     | 19.85(1.92)             | 222.56(27.23)        | 1.76(0.18)              | 63.88(9.79)      | 73.20(3.93)      | 26.19(0.59)      |
| <b>Young Stem</b>        | 6.01(0.13)                      | 10.20(0.05)             | 63.91(3.69)          | 1.18(0.47)              | 30.00(10.04)     | 41.13(11.60)     | 13.69(4.12)      |
| <b>Old Stem</b>          | 18.85(0.45)                     | 12.64(1.20)             | 113.56(18.66)        | 1.64(0.29)              | 43.07(0.90)      | 48.58(0.25)      | 25.42(0.11)      |
| <b>Palea/lemma</b>       | 31.33(0.90)                     | 19.06(0.88)             | 245.82(21.39)        | 1.61(0.07)              | 71.72(3.21)      | 54.50(3.72)      | 25.18(0.63)      |
| <b>Spikelet</b>          | 26.86(0.42)                     | 16.58(0.81)             | 177.87(22.58)        | 1.88(0.13)              | 65.49(8.27)      | 107.19(4.80)     | 22.47(3.39)      |
| <b>Stamen</b>            | 2.30(0.02)                      | 21.78(1.82)             | 30.76(5.25)          | 3.49(0.66)              | 13.63(0.31)      | 17.36(0.10)      | 4.80(0.27)       |
| <b>Endosperm 1</b>       | 0.29(0.03)                      | 3.26(0.47)              | 3.49(0.73)           | 0.03(0.03)              | 4.93(0.41)       | 1.18(0.09)       | 1.07(0.14)       |
| <b>Endosperm 2</b>       | 0.67(0.03)                      | 3.98(1.19)              | 5.83(1.63)           | 0.16(0.03)              | 8.09(1.27)       | 1.60(0.56)       | 1.06(0.36)       |
| <b>Endosperm 3</b>       | 0.68(0.07)                      | 5.71(1.11)              | 6.93(1.51)           | 1.12(0.75)              | 7.12(0.21)       | 1.35(0.08)       | 1.07(0.08)       |
