# Supplementary material for: An integrated genomic and metabolomic framework for cell wall biology in rice
Source: PubMed Central journal article supplement (PMC4112216; doi:10.1186/1471-2164-15-596), 2014-07-15
Supplement: 12864_2013_6285_MOESM8_ESM.pdf [file 12864_2013_6285_MOESM8_ESM.pdf]

|                  | <b>Cellulose</b> | <b>Arabinose</b> | <b>Xylose</b> | <b>Galatcose</b> | <b>H unit</b> | <b>G unit</b> | <b>S unit</b> |
|------------------|------------------|------------------|---------------|------------------|---------------|---------------|---------------|
| <b>Cellulose</b> |                  | 0.37*            | 0.89**        | 0.03             | 0.81**        | 0.70**        | 0.71**        |
| <b>Arabinose</b> | 0.37*            |                  | 0.34          | 0.81**           | 0.26          | 0.42*         | 0.25          |
| <b>Xylose</b>    | 0.89**           | 0.34             |               | -0.06            | 0.90**        | 0.75**        | 0.81**        |
| <b>Galatcose</b> | 0.03             | 0.81**           | -0.06         |                  | -0.10         | 0.09          | -0.06         |
| <b>H unit</b>    | 0.81**           | 0.26             | 0.90**        | -0.10            |               | 0.81**        | 0.89**        |
| <b>G unit</b>    | 0.70**           | 0.42*            | 0.75**        | 0.09             | 0.81**        |               | 0.76**        |
| <b>S unit</b>    | 0.71**           | 0.25*            | 0.81**        | -0.06            | 0.89**        | 0.76**        |               |

\*  $p < 0.05$ ; \*\*  $p < 0.01$ .
